# Supplementary material for: p53 directly represses human LINE1 transposons
Source: PubMed Central journal article supplement — Genes Dev. 2020 Nov 1;34(21-22):1439–51. doi: 10.1101/gad.343186.120 (PMC7608743; doi:10.1101/gad.343186.120), 2020-11-01
Supplement: supp_gad.343186.120_Supplemental_Information_DNA_sequences.pdf [file supp_gad.343186.120_Supplemental_Information_DNA_sequences.pdf]

**DNA sequences used in this project.** The full length drz-Fpra-2 DNA sequence with T7 promoter (underlined), and leader sequence is: 5'-TAATACGACTCACTATAGGGAGATATAAGGTTGTGGGAAGGTTCTCACAGCTTTGCCGCTCGAAACTTTGCACACCTCTACGCGGTGGGTGGCAGGCAACACATGAGAATGTGGCTGAGATGCAATATTGTC-3'. The first cytosine is in bold. To amplify the template by PCR, the forward primer sequences used in this study were 5'-TAATACGACTCACTATAGG-3' and 5'-GACAATATTGCATCTCAGCCACAT-3'. The full-length KlenTaq DNA polymerase DNA sequence with T7 promoter (underlined), and leader sequence is:

5'-TAATACGACTCACTATAGGGAGATATAAGGTTGTGGGAAGGTTCCACAACGGTTTCCCTCTAGAAATAATTTTGTTTAACTTTAAGAAGGAGATATATCCATGGGCCTCCTCCACGAGTTCGGCCTTCTGGAAAGCCCCAAGGCCCTGGAGGAGGCCCCCTGGCCCCGCGCGAAGGGGCCTTCGTGGGCTTTGTGCTTTCCCGCAAGGAGCCCATGTGGGCCGATCTTCTGGCCCTGGCCGCCAGGGGGGGCCGGGTCCACCGGGCCCCGAGCCTTATAAAGCCCTCAGGGACCTGAAGGAGGCGCGGGGGCTTCTCGCCAAAGACCTGAGCGTTCTGGCCCTGAGGGAAGGCCTTGGCCTCCCGCCCCGGCGACGACCCCATGCTCCTCGCCTACCTCCTGGACCCTTCCAACACCACCCCCGAGGGGGTGGCCCGGCGCTACGGCGGGGAGTGGACGGAGGAGGCGGGGGAGCGGGCCGCCCTTTCCGAGAGGCTTTCGCCAACCTGTGGGGGAGGCTTGAGGGGGAGGAGAGGCTCCTTTGGCTTTACCGGGAGGTGGAGAGGCCCTTTCCGCTGTCCTGGCCACATGGAGGCCACGGGGGTGCGCCTGGACGTGGCCTATCTCAGGGCCTTGTCCCTGGAGGTGGCCGAGGAGATCGCCCGCCTCGAGGCCGAGGTCTTCCGCCTGGCCGGCCACCCCTTCAACCTCAACTCCCGGGACCAGCTGGAAAGGGTCCTCTTTGACGAGCTAGGGCTTCCCGCCATCGGCAAGACGGAGAAGACCGGCAAGCGCTCCACCAGCGCCGCCGTCCTGGAGGCCCTCCGCGAGGCCACCCCATCGTGGAGAAGATCCTGCAGTACCGGGAGCTACCAAGCTGAAGAGCACCTACATTGACCCCTTGCCGGACCTCATCCACCCAGGACGGGCCCGCCTCCACACCCGCTTCAACCAGACGGCCACGGCCACGGGCAGGCTAAGTAGCTCCGATCCCAACCTCCAGAACATCCCCGTCCGCACCCCGCTTGGGCAGAGGATCCGCCGGGCCTTCATCGCCGAGGAGGGGTGGCTATTGGTG

GCCCTGGACTATAGCCAGATAGAGCTCAGGGTGCTGGCCCACCTCTCCGGCGAC  
GAGAACCTGATCCGGGTCTTCCAGGAGGGGCGGGACATCCACACGGAGACCGCC  
AGCTGGATGTTCCGGCGTCCCCCGGGAGGCCGTGGACCCCCTGATGCGCCGGGC  
GGCCAAGACCATCAACTTCGGGGTCCTCTACGGCATGTCGGCCCACCGCCTCTCC  
CAGGAGCTAGCCATCCCTTACGAGGAGGCCAGGCCTTCATTGAGCGCTACTTTC  
AGAGCTTCCCCAAGGTGCGGGCCTGGATTGAGAAGACCCTGGAGGAGGGCAGGA  
GGCGGGGGTACGTGGAGACCCTCTTCGGCCGCCGCCGCTACGTGCCAGACCTAG  
AGGCCCGGGTGAAGAGCGTGCGGGAGGCCGCCGAGCGCATGGCCTTCAACATG  
CCCGTCCAGGGCACCGCCGCCGACCTCATGAAGCTGGCTATGGTGAAGCTCTTCC  
CCAGGCTGGAGGAAATGGGGGCCAGGATGCTCCTTCAGGTCCACGACGAGCTGG  
TCCTCGAGGCCCCAAAAGAGAGGGCGGAGGCCGTGGCCC GGCTGGCCAAGGAG  
GTCATGGAGGGGGTGTATCCCCTGGCCGTGCCCTGGAGGTGGAGGTGGGGATA  
GGGGAGGACTGGCTCTCCGCCAAGGAGTGATCGATGATAAGCTGTCAAACATGAG  
CAGATCTGAGCCCGCCTAATGAGCGGGCTTTTTTTTTTCAGATCTGCTTGAAGACGAA  
AG-3'.

The first cytosine is shown in bold. To amplify the template by PCR, the primer sequences used for this construct are 5'-TAATACGACTCACTATAGG-3' and 5'-CTTTCGTCTTCAAGCAGATCTG-3'. The full-length antigenomic HDV (aHDV) sequence with T7 promoter (underlined), and leader sequence is: 5'-TTCCCGCGAAATTAATACGACTCACTATAGGGAGGTTT**G**CGTCTCGCGTCCTTCTTTCCTCTTCGGGTTCGGCATGGCATCTCCACCTCCTCGCGGTCCGACCTGGGCATCCGAAGGAGGACGCACGTCCACTCGGATGGCTAAGGGAGAGCCA-3'. The first cytosine is in bold. To amplify the template by PCR, the primer sequences used for this construct are 5'-TTCCCGCGAAATTAATACGACTCACTA-3' and 5'-TGGCTCTCCCTTAGCCATCCGAG-3'.
